# Supplementary material
Source: PubMed Central journal article supplement (PMC2625310)
Supplement: NIHMS62260-supplement-si20070206_070.pdf [file NIHMS62260-supplement-si20070206_070.pdf]

## Supporting Information

### **Radiolabeled Phenethylguanidines: Novel Imaging Agents for Cardiac Sympathetic Neurons and Adrenergic Tumors**

David M. Raffel, Yong-Woon Jung, David L. Gildersleeve, Phillip S. Sherman, James J. Moskwa, Louis J. Tluczek, and Wei Chen

*Division of Nuclear Medicine, Department of Radiology, University of Michigan Medical School, Ann Arbor, Michigan 48109*

**Table 1.** Summary of chemical purity measurements determined by HPLC analysis.

| Compound  | Chemical purity |
|-----------|-----------------|
| <b>1e</b> | 99.8%           |
| <b>1g</b> | 99.6%           |
| <b>1h</b> | 98.9%           |
| <b>1i</b> | 100.0%          |
| <b>1j</b> | 99.6%           |
| <b>1k</b> | 95.2%           |

Values were determined on a Shimadzu model LC-10ADvp liquid chromatograph system.

Sample Name: (-)- $\beta$ -Guanyl-*meta*-octapamine (compound **1e**)  
Column: Phenomenex, Synergi 4  $\mu$  Hydro RP  
Dimension: 150 x 4.6 mm,  
Mobile Phase: EtOH / 0.1 M Ammonium Acetate = 3 / 97  
Flow Rate: 1.0 ml/min  
Detection: UV @ 241nm

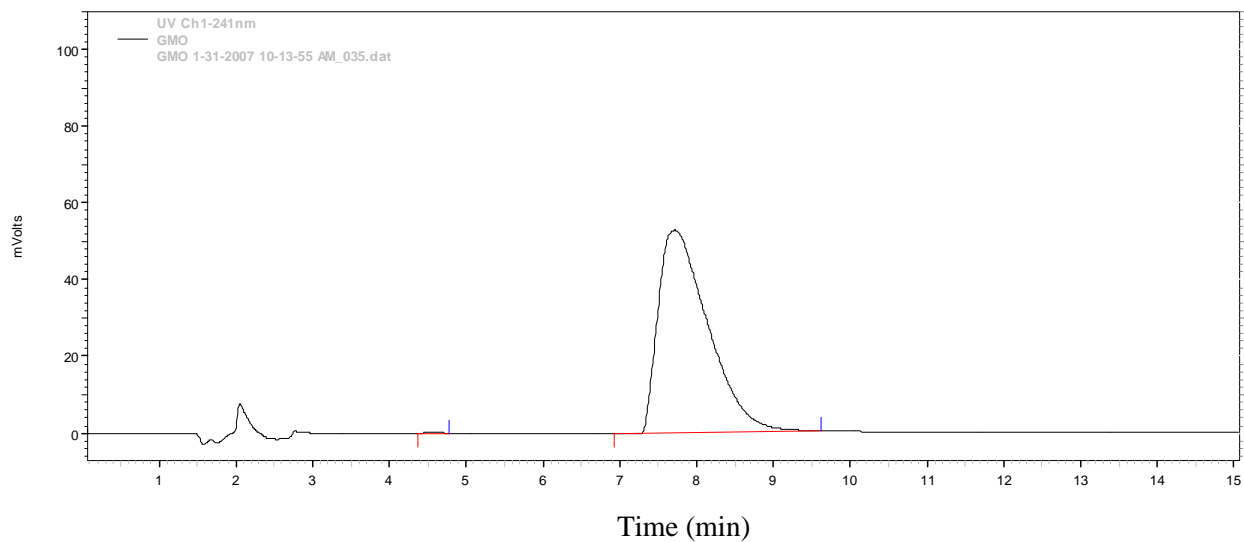

UV Ch1-241nm

Results

| Retention Time | Area    | Area Percent |
|----------------|---------|--------------|
| 4.49           | 1114    | 0.2          |
| 7.65           | 2376568 | 99.8         |
| Totals         | 2377682 | 100.000      |

Sample Name: 3-Fluorophenethylguanidine sulfate (**1g**)  
Column: Phenomenex, Synergi 4  $\mu$  Hydro RP  
Dimension: 50 x 4.6 mm,  
Mobile Phase: EtOH / 0.1 M Ammonium Acetate = 20 / 80  
Flow Rate: 1.0 ml/min  
Detection: UV @ 241nm

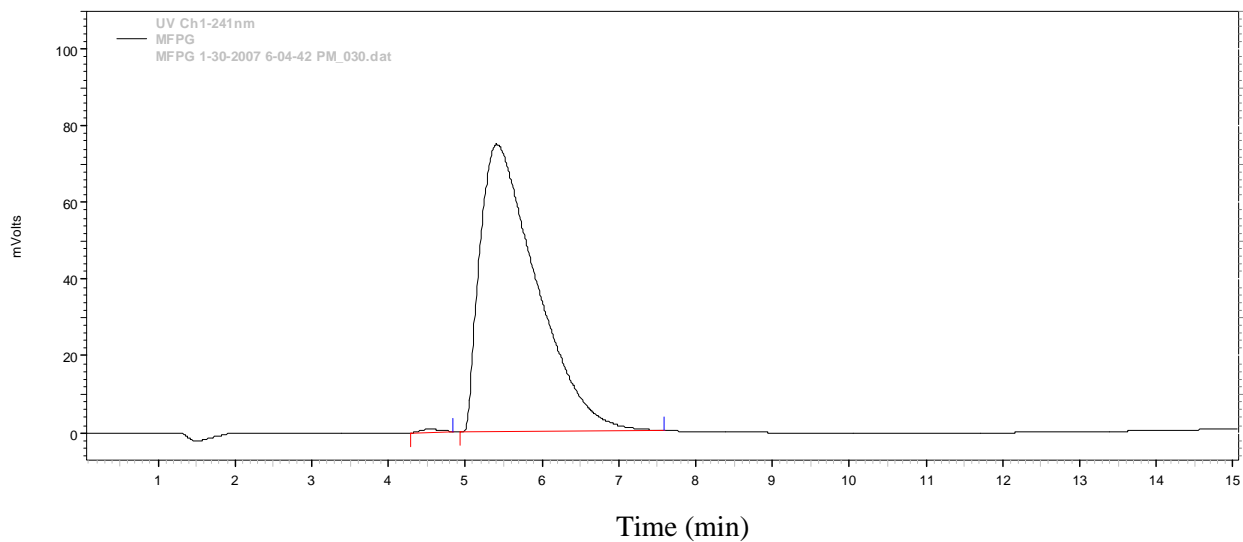

UV Ch1-241nm

Results

| Retention Time | Area    | Area Percent |
|----------------|---------|--------------|
| 4.48           | 14549   | 0.4          |
| 5.35           | 3833597 | 99.6         |
| Totals         | 3848146 | 100.0        |

Sample Name: 4-Fluorophenethylguanidine sulfate (**1h**)

Column: Phenomenex, Synergi 4  $\mu$  Hydro RP

Dimension: 50 x 4.6 mm,

Mobile Phase: EtOH / 0.1 M Ammonium Acetate = 20 / 80

Flow Rate: 1.0 ml/min

Detection: UV @ 241nm

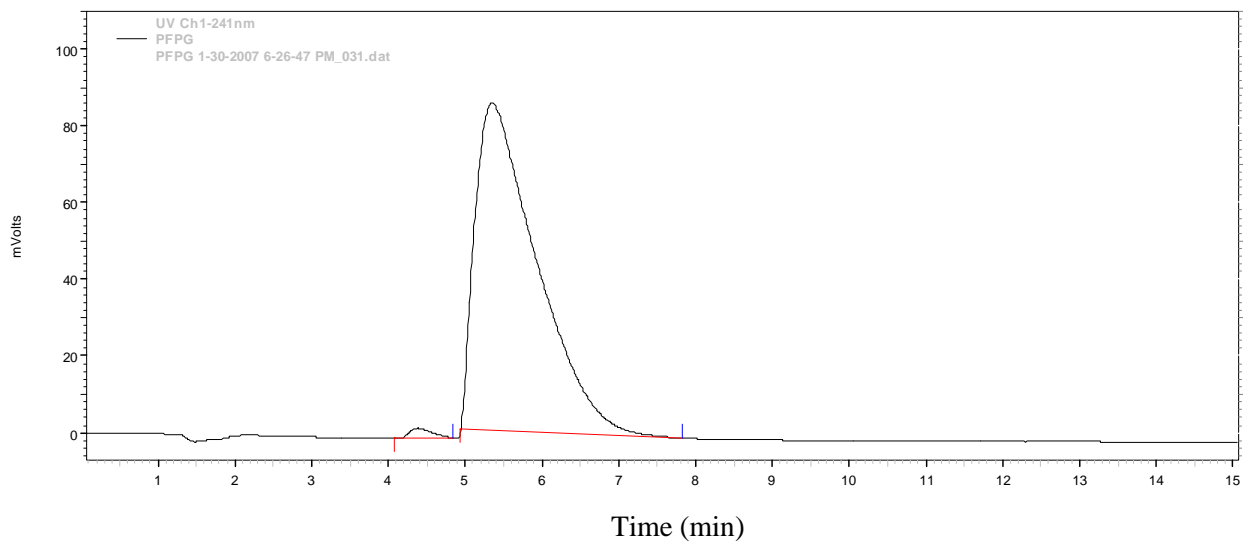

UV Ch1-241nm

Results

| Retention Time | Area    | Area Percent |
|----------------|---------|--------------|
| 4.32           | 52150   | 1.1          |
| 5.29           | 4773486 | 98.9         |
| Totals         | 4825636 | 100.0        |

Sample Name: 2-Fluorophenethylguanidine sulfate (**1i**)  
Column: Phenomenex, Synergi 4  $\mu$  Hydro RP  
Dimension: 50 x 4.6 mm,  
Mobile Phase: EtOH / 0.1 M Ammonium Acetate = 20 / 80  
Flow Rate: 1.0 ml/min  
Detection: UV @ 241nm

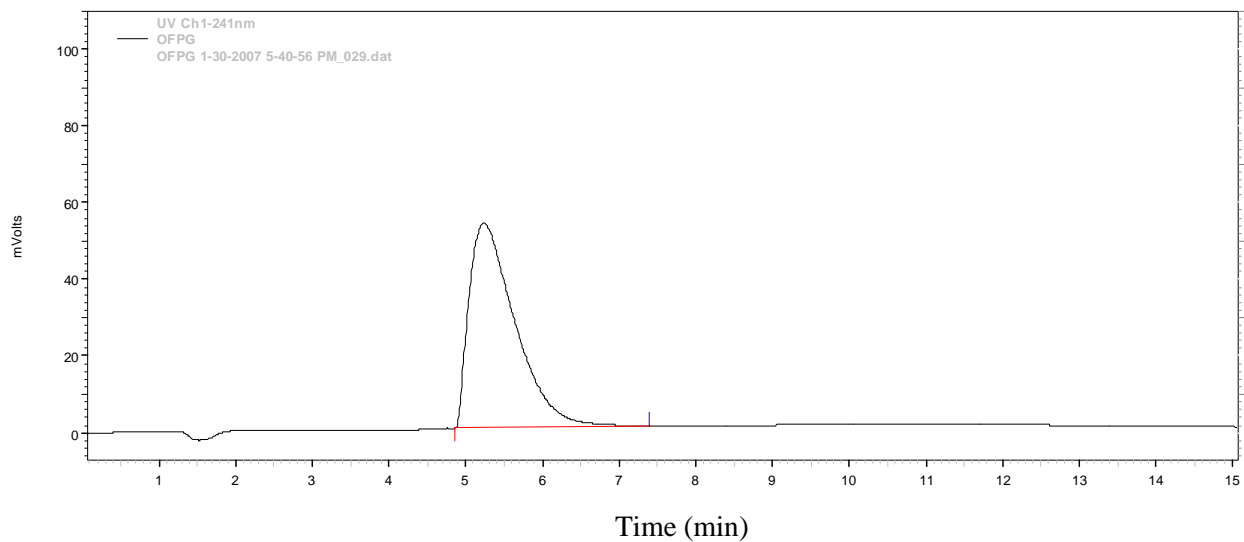

UV Ch1-241nm  
Results

| Retention Time | Area    | Area Percent |
|----------------|---------|--------------|
| 5.18           | 2218008 | 100.0        |
| Totals         | 2218008 | 100.0        |

Sample Name : 4-Fluoro-3-hydroxyphenethylguanidine sulfate (**1j**)

Column: Phenomenex, Synergi 4  $\mu$  Hydro RP

Dimension: 150 x 4.6 mm,

Mobile Phase: EtOH / 0.1 M Ammonium Acetate = 5 / 95

Flow Rate: 2.4 ml/min

Detection: UV @ 241nm

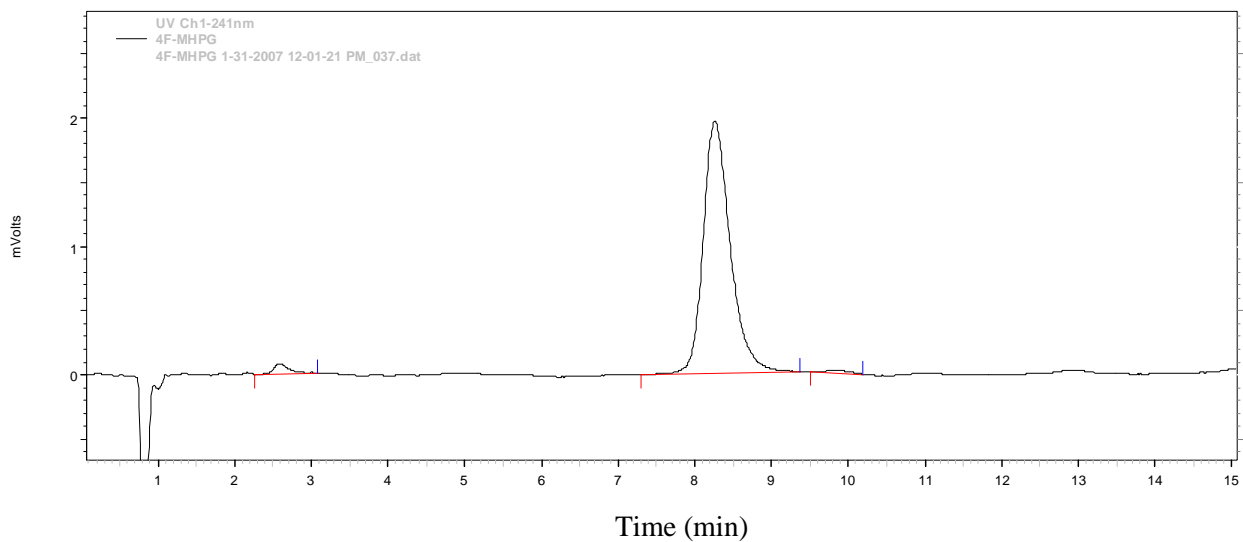

UV Ch1-241nm

Results

| Retention Time | Area    | Area Percent |
|----------------|---------|--------------|
| 2.45           | 133     | 0.4          |
| 8.20           | 33225   | 99.6         |
| Totals         | 3848146 | 100.0        |

Sample Name: 6-Fluoro-3-hydroxyphenethylguanidine sulfate (**1k**)  
Column: Phenomenex, Synergi 4  $\mu$  Hydro-Rp  
Dimension: 150 x 4.6 mm,  
Mobile Phase: EtOH / 60nM Sodium Phosphate = 10 / 90  
Flow Rate: 1.3 ml/min  
Detection: UV @ 241nm

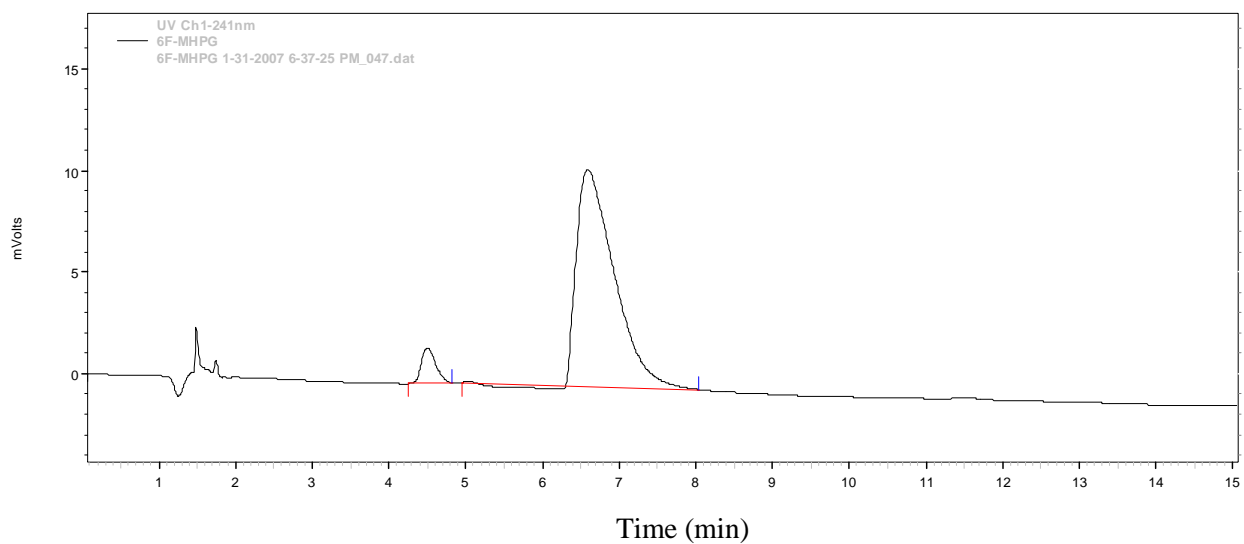

UV Ch1-241nm

Results

| Retention Time | Area   | Area Percent |
|----------------|--------|--------------|
| 4.44           | 19068  | 4.8          |
| 6.533          | 378199 | 95.2         |
| Totals         | 400927 | 100.000      |
